# Supplementary material for: A binder-driven cathode–electrolyte interphase via a displacement reaction for high voltage Na3V2(PO4)2F3 cathodes in sodium-ion batteries
Source: Royal Society of Chemistry journal article supplement (doi:10.1039/d2ta07990a), 2023-01-01
Supplement: d2ta07990a1.pdf [file d2ta07990a1.pdf]

# Binder-Driven Cathode–Electrolyte Interphase via Displacement Reaction for High Voltage $\text{Na}_3\text{V}_2(\text{PO}_4)_2\text{F}_3$ Cathode in Sodium-Ion Batteries

*Dae Hui Yun,<sup>‡a</sup> Jinju Song,<sup>‡a</sup> Jiseong Kim,<sup>a</sup> Joon Kyo Seo,<sup>a</sup> Joonhee Kang,<sup>b</sup> Sohyun Park,<sup>c</sup>  
Jaekook Kim,<sup>c</sup> Dong-Joo Yoo,<sup>\*d</sup> and Sunghun Choi<sup>\*a</sup>*

<sup>a</sup>Gwangju Clean Energy Center, Korea Institute of Energy Research (KIER), 270-25 Samsoro, Buk-gu, Gwangju 61003, Republic of Korea

<sup>b</sup>Computational Science & Engineering Laboratory, Korea Institute of Energy Research (KIER), 152 Gajeong-ro, Yuseong-gu, Daejeon 34129, Republic of Korea

<sup>c</sup>Department of Materials Science and Engineering, Chonnam National University, Gwangju 61186, Republic of Korea

<sup>d</sup>School of Mechanical Engineering, Korea University, 145 Anam-ro, Seongbuk-gu, Seoul 02841, Republic of Korea

## AUTHOR INFORMATION

### Corresponding Author

Dong-Joo Yoo\* (E-mail: [djyoo@korea.ac.kr](mailto:djyoo@korea.ac.kr))

Sunghun Choi\* (E-mail: [s.h.choi@kier.re.kr](mailto:s.h.choi@kier.re.kr))

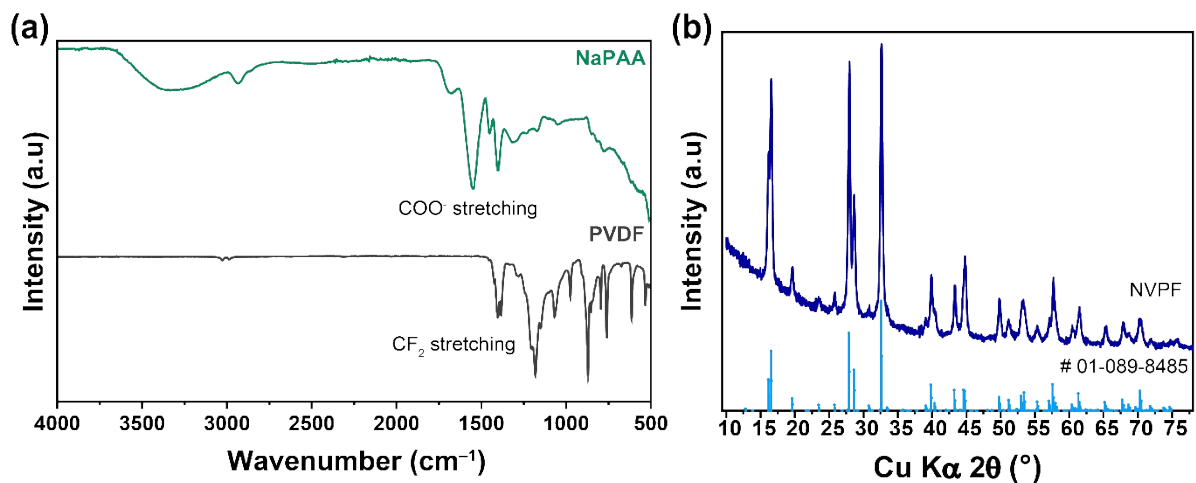

Fig. S1 (a) FT-IR spectra and (b) XRD profile of synthesized NVPF of NaPAA and PVDF binders.

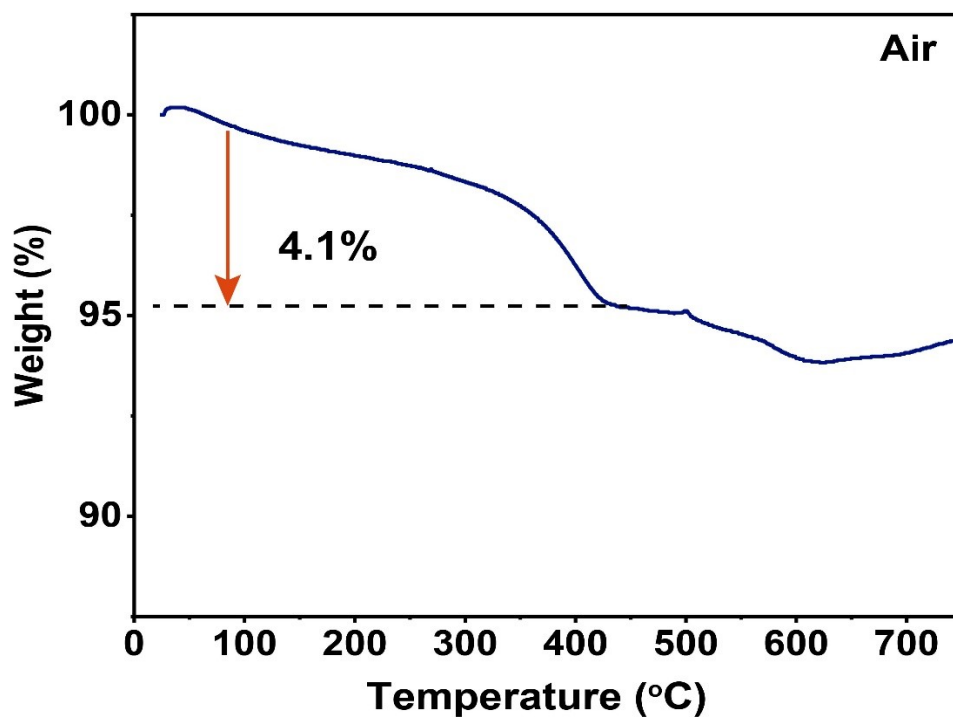

Fig. S2 Thermogravimetric analysis of NVPF under air at a heating rate of  $10^\circ\text{C min}^{-1}$ .

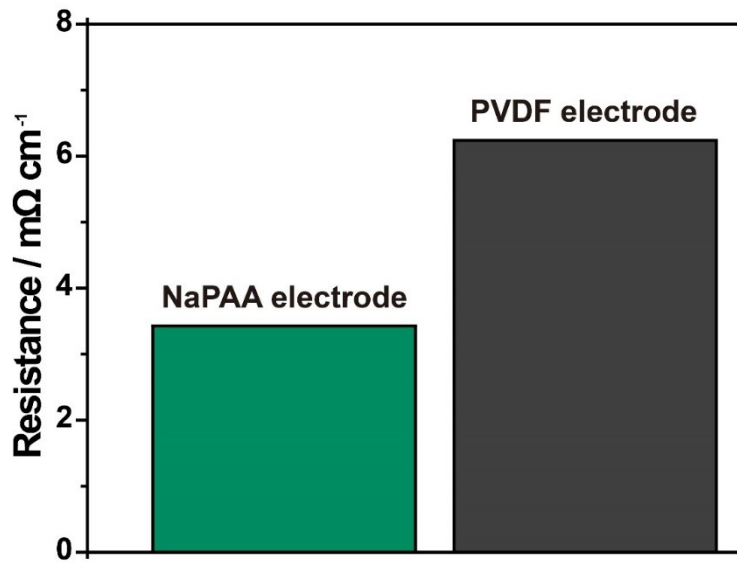

**Fig. S3** NaPAA and PVDF electrode resistances from four-point probe measurements.

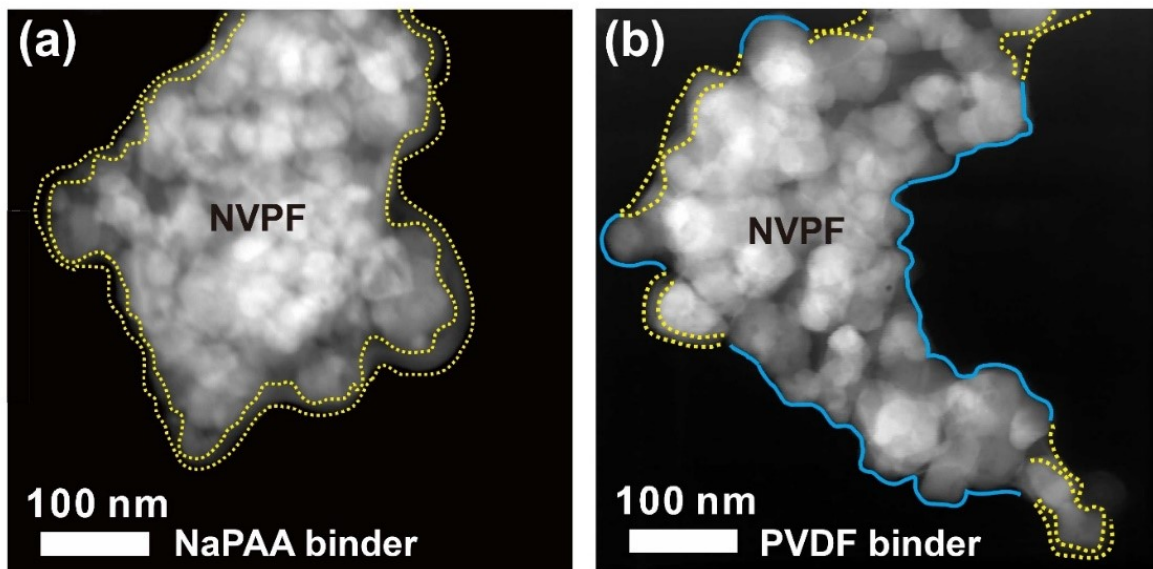

**Fig. S4** TEM images of NVPF particles with (a) NaPAA or (b) PVDF binder. Binder coverage section is shown by the yellow dotted line, while non-coverage part is indicated by the sky-blue line.

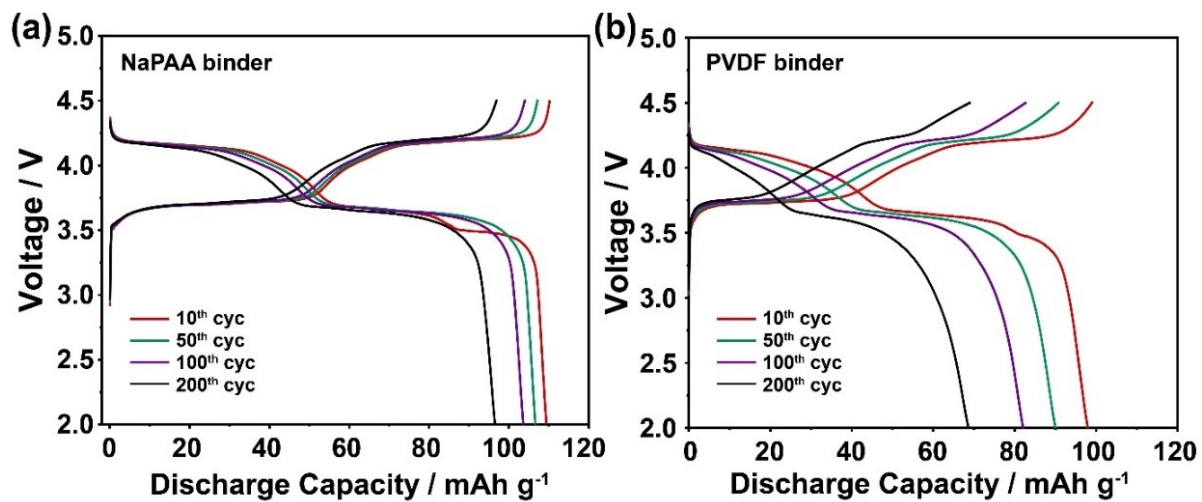

Fig. S5 Voltage profiles of (a) NaPAA and (b) PVDF electrodes at 10, 50, 100, and 200 cycles, at a rate of 1C.

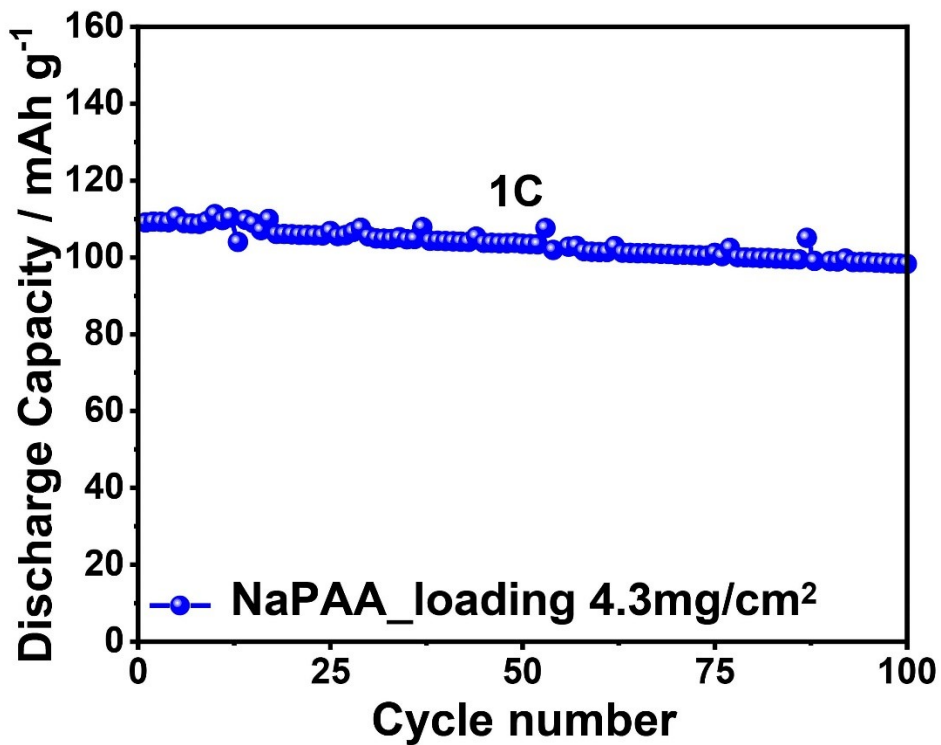

Fig. S6 Cycling performance of NVPF electrode with NaPAA binder at 4.3 mg cm<sup>-2</sup>.

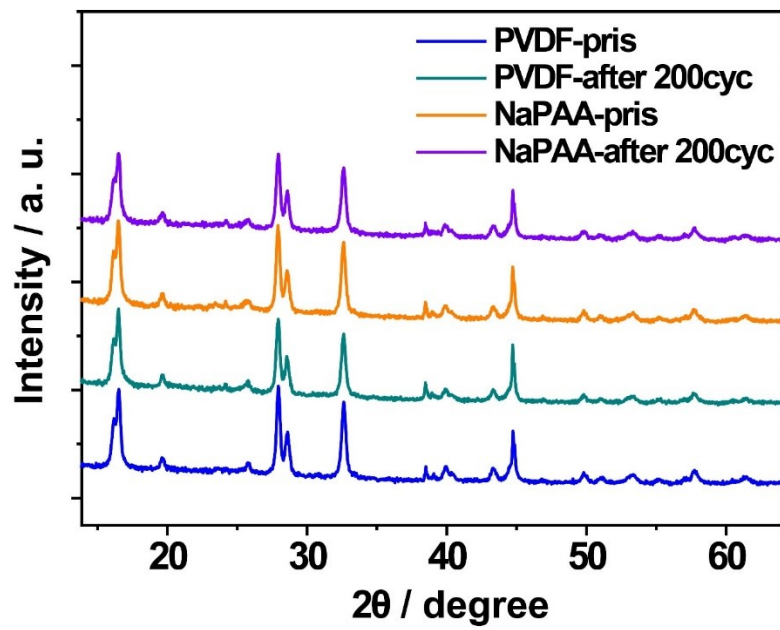

Fig. S7 XRD profiles of electrodes at pristine and after 200 cycles for NaPAA and PVDF binders.

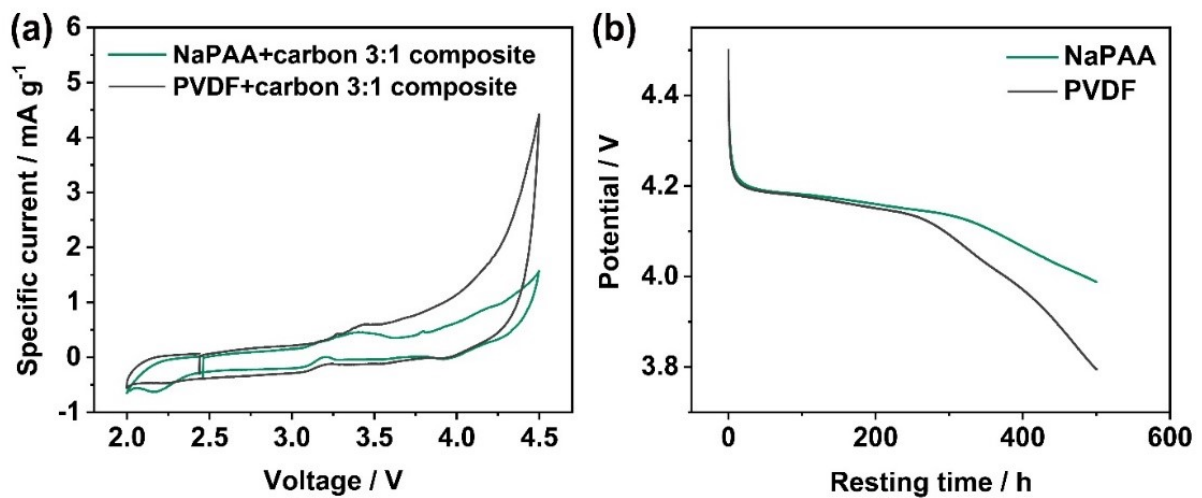

Fig. S8 (a) CV profiles of carbon electrodes with NaPAA and PVDF binders. (b) Self-discharge test result of voltage changes of NaPAA and PVDF electrodes at charged state.

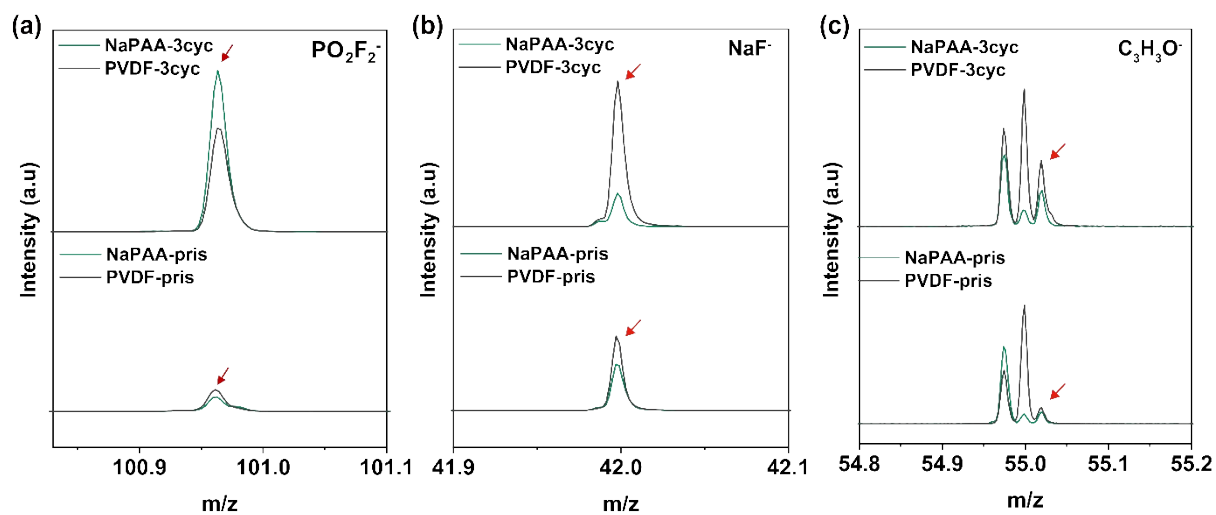

**Fig. S9** ToF-SIMS profiles of (a)  $\text{PO}_2\text{F}_2^-$ , (b)  $\text{NaF}^-$ , and (c)  $\text{C}_3\text{H}_3\text{O}^-$  for NaPAA and PVDF electrodes at pristine and 3 cycles.
